# Supplementary material for: Iron and copper on Botrytis cinerea : new inputs in the cellular characterization of their inhibitory effect
Source: PeerJ journal article supplement (doi:10.7717/peerj.15994), 2023-09-20
Supplement: Raw_data.zip [file Raw_data.zip]

## Sheet: metals and fungicides
		Copper and fungicides OD
			Cu	Cu	Boscalid + Cu	Boscalid +Cu	iprodione+Cu	iprodione+Cu	Fenexamid+cu	Fenexamid+cu	Boscalid	iprodione	Fenexamid	MEB				Boscalid	iprodione	Fenexamid	Cu	Boscalid + Cu	iprodione+Cu	Fenexamid+Cu	MEB 100%
			1	2	3	4	5	6	7	8	9	10	11	12		B05.10	B0510	0.466	0.6515	0.61	0.47725	0.13975	0.42525	0.17075	0.8185
	B05.10	B0510	0.504	0.505	0.146	0.132	0.375	0.533	0.273	0.168	0.627	0.666	0.604	0.79			SD	0.227688	0.0205061	0.00848528	0.0453532	0.0456828	0.139896	0.0735136	0.0403051
		B0510	0.49	0.41	0.085	0.196	0.543	0.25	0.141	0.101	0.305	0.637	0.616	0.847		Bc.vi09	Silv-1	0.644	0.7005	0.617	0.3255	0.052	0.338	0.31375	0.808
	Bc.vi09	Silv-1	0.338	0.345	0.055	0.047	0.178	0.309	0.143	0.474	0.634	0.701	0.611	0.833			SD	0.0141421	0.000707107	0.00848528	0.090541	0.00476095	0.121718	0.135682	0.0353553
		Silv-1	0.201	0.418	0.057	0.049	0.424	0.441	0.332	0.306	0.654	0.7	0.623	0.783		Bc.po03	Silv-2	0.7335	0.604	0.6315	0.149	0.036	0.34925	0.18775	0.759
	Bc.po03	Silv-2	0.15	0.139	0.031	0.028	0.116	0.554	0.169	0.244	0.765	0.577	0.611	0.735			SD	0.0445477	0.0381838	0.0289914	0.0242625	0.0133915	0.218982	0.0623451	0.0339411
		Silv-2	0.182	0.125	0.056	0.029	0.517	0.21	0.23	0.108	0.702	0.631	0.652	0.783		Bc.ad03	Silv-3	0.6815	0.644	0.625	0.31625	0.09425	0.133	0.146	0.7755			Table 1 for Compilation of samples
	Bc.ad03	Silv-3	0.324	0.292	0.039	0.163	0.195	0.122	0.211	0.125	0.674	0.624	0.636	0.76			SD	0.0106066	0.0282843	0.0155563	0.0574362	0.051299	0.0426067	0.0438254	0.0219203
		Silv-3	0.257	0.392	0.091	0.084	0.098	0.117	0.116	0.132	0.689	0.664	0.614	0.791																																			Similar Table 1 for Compilation of samples (organization of data to graph)
																	Survival rate %											%															promedios
		Copper and fungicides OD															%												boscalid	iprodione	fenhexamid	Cu	boscalid + Cu	iprodione+Cu	fenhexamid+Cu	Fe	boscalid	iprodione	fenhexamid	boscalid + Fe	iprodione + Fe	fenhexamid + Fe	boscalid	iprodione	fenhexamid				%
																		boscalid	iprodione	fenhexamid	Cu	boscalid + Cu	iprodione+Cu	fenhexamid+Cu			B05.10	B0510	56.9334	79.5968	74.5266	58.3079	17.0739	51.9548	20.8613	8.37989	83.2961	84.4693	72.067	13.7151	11.8715	16.3128	70.1148	82.033	73.2968
			Cu	Boscalid + CU	iprodione+Cu	Fenexamid+cu	Boscalid	iprodione	Fenexamid	MEB						B05.10	B0510	56.9334	79.5968	74.5266	58.3079	17.0739	51.9548	20.8613				SD	27.8178	2.50533	1.03669	5.54102	5.58128	17.0918	8.9815	0.952455	3.39727	5.37243	3.16025	3.61981	4.9729	4.62215	18.6412	3.44534	1.73915			B05.10	B0510
	B05.10	B0510	0.47725	0.13975	0.42525	0.17075	0.466	0.6515	0.61	0.8185							SD	27.8178	2.50533	1.03669							Bc.vi09	Silv-1	79.703	86.6955	76.3614	40.2847	86.6955	76.3614	38.8304	6.27142	84.3729	93.3516	91.501	13.708	21.316	20.6648	82.0379	90.0236	83.9312				SD
		SD	0.0453532	0.0456828	0.139896	0.0735136	0.227688	0.0205061	0.00848528	0.0403051						Bc.vi09	Silv-1	79.703	86.6955	76.3614	40.2847	6.43564	41.8317	38.8304				SD	1.75026	0.0875132	1.05016	1.75026	0.0875132	1.05016	16.7923	2.93444	2.2294	0.581582	3.00484	1.39795	0.326316	0.675042	3.30211	4.70655	10.7053			Bc.vi09	Silv-1
	Bc.vi09	Silv-1	0.3255	0.052	0.338	0.31375	0.644	0.7005	0.617	0.808							SD	1.75026	0.0875132	1.05016							Bc.po03	Silv-2	96.6403	79.5784	83.2016	19.6311	79.5784	83.2016	24.7365	24.5707	87.7807	94.9141	83.7517	11.889	22.2919	22.1598	92.2105	87.2463	83.4766				SD
		SD	0.090541	0.00476095	0.121718	0.135682	0.0141421	0.000707107	0.00848528	0.0353553						Bc.po03	Silv-2	96.6403	79.5784	83.2016	19.6311	4.74308	46.0145	24.7365				SD	5.86927	5.0308	3.81968	5.86927	5.0308	3.81968	8.21412	0.940298	1.96159	0.840682	3.73636	7.85599	0.844995	1.19318	6.26469	10.844	0.388958			Bc.po03	Silv-2
	Bc.po03	Silv-2	0.149	0.036	0.34925	0.18775	0.7335	0.604	0.6315	0.759							SD	5.86927	5.0308	3.81968							Bc.ad03	Silv-3	87.8788	83.0432	80.5932	40.7801	83.0432	80.5932	18.8266	20.7393	87.9073	93.0451	82.9574	5.26316	19.2982	18.7657	87.893	88.0442	81.7753				SD
		SD	0.0242625	0.0133915	0.218982	0.0623451	0.0445477	0.0381838	0.0289914	0.0339411						Bc.ad03	Silv-3	87.8788	83.0432	80.5932	40.7801	12.1534	17.1502	18.8266				SD	1.36771	3.64723	2.00598	1.36771	3.64723	2.00598	5.65125	0.994643	10.5446	5.58242	0.708879	1.26973	3.60734	2.96788	0.0201386	7.07242	1.67176			Bc.ad03	Silv-3
	Bc.ad03	Silv-3	0.31625	0.09425	0.133	0.146	0.6815	0.644	0.625	0.7755							SD	1.36771	3.64723	2.00598																													SD
		SD	0.0574362	0.051299	0.0426067	0.0438254	0.0106066	0.0282843	0.0155563	0.0219203
																																																	Average for graph




																																																	Standard deviation for error bars
		Iron and fungicides OD
																																																B05.10	SD
			Fe	Fe	Boscalid + Fe	Boscalid +Fe	iprodione+Fe	iprodione+Fe	Fenexamid+Fe	Fenexamid+Fe	Boscalid	iprodione	Fenexamid	MEB																																		Bc.vi09	SD
			1	2	3	4	5	6	7	8	9	10	11	12																																		Bc.po03	SD
		B0510	0.063	0.076	0.112	0.105	0.172	0.081	0.196	0.099	0.724	0.722	0.625	1.033																																		Bc.ad03	SD
		B0510	0.083	0.078	0.171	0.103	0.077	0.095	0.159	0.13	0.767	0.79	0.665	0.757
		Silv-1	0.071	0.027	0.096	0.1	0.156	0.157	0.147	0.146	0.627	0.684	0.683	0.721
		Silv-1	0.056	0.029	0.09	0.114	0.152	0.157	0.155	0.155	0.604	0.678	0.652	0.738
		Silv-2	0.196	0.182	0.057	0.058	0.172	0.176	0.18	0.16	0.654	0.714	0.654	0.739
		Silv-2	0.18	0.186	0.179	0.066	0.162	0.165	0.169	0.162	0.675	0.723	0.614	0.775
		Silv-3	0.167	0.176	0.051	0.049	0.188	0.166	0.134	0.169	0.642	0.711	0.658	0.728
		Silv-3	0.161	0.158	0.039	0.029	0.139	0.123	0.125	0.171	0.761	0.774	0.666	0.868
		Iron and fungicides OD
			Fe	Boscalid + Fe	iprodione+Fe	Fenexamid+Fe	Boscalid	iprodione	Fenexamid	MEB
		B0510	0.075	0.12275	0.10625	0.146	0.7455	0.756	0.645	0.895
		SD	0.00852447	0.0323973	0.0445075	0.0413683	0.0304056	0.0480833	0.0282843	0.195161
		Silv-1	0.04575	0.1	0.1555	0.15075	0.6155	0.681	0.6675	0.7295
		SD	0.0214068	0.010198	0.00238048	0.00492443	0.0162635	0.00424264	0.0219203	0.0120208
		Silv-2	0.186	0.09	0.16875	0.16775	0.6645	0.7185	0.634	0.757
		SD	0.00711805	0.0594699	0.00639661	0.00903235	0.0148492	0.00636396	0.0282843	0.0254558
		Silv-3	0.1655	0.042	0.154	0.14975	0.7015	0.7425	0.662	0.798
		SD	0.00793725	0.0101325	0.0287866	0.0236837	0.0841457	0.0445477	0.00565685	0.0989949
[truncated: 17 more columns]
